# Supplementary material for: Prevalence of uncontrolled blood pressure in Meknes, Morocco, and its associated risk factors in 2017
Source: PubMed Central journal article supplement (PMC6688818; doi:10.1371/journal.pone.0220710), 2019-08-09
Supplement: pone.0220710.s001.pdf [file pone.0220710.s001.pdf]

**Questionnaire of hypertensive patients**

**Survey Information**

Survey location: ----- Date of survey: /\_\_//\_\_ / /\_\_//\_\_ / /\_\_//\_\_  
dd mm yy

Interviewer ID /\_\_//\_\_ / (Initial of interviewer + initials of primary care health center)  
 Time of the interview: /\_\_//\_\_ / /\_\_//\_\_ / Hour Minute

Participant ID Number /\_\_//\_\_ / /\_\_//\_\_ / (patient order number + interviewer ID)  
 Consent has been read: /\_\_// yes /\_\_// no  
If NO, END

Consent has been obtained, orally or written form: /\_\_// yes /\_\_// non  
If NO, END

**Additional Information that may be helpful**

Contact phone number where possible  
 The information collected through this document will be treated with the utmost confidentiality and will be subject to the rules of ethics relating to the respect of patient privacy and medical confidentiality.

**Demographic Information**

**Gender:** Male /\_\_// Female /\_\_// **Age:** /\_\_// years or date of birth /\_\_//\_\_//\_\_//

**Residence Area:** Urban /\_\_// Rural /\_\_//

**Marital status:** single /\_\_// married /\_\_// divorced /\_\_// widowed /\_\_//

**Education:** Can read and write /\_\_// cannot read nor write /\_\_//

**Level of education:** illiterate /\_\_// primary /\_\_// secondary /\_\_// university /\_\_//

**Occupation:** without /\_\_// with /\_\_// if with, specify:-----

**Monthly income per household in Dhs:**  ≤1500  >1500-≤2000  >2000- 3000  >3000-4999  
 ≥5.000

**Health insurance coverage:** Private insurance /\_\_// RAMED /\_\_// without /\_\_//

**Risk factors**

Blood pressure duration: \_\_\_\_\_ years

**Circumstance of discovery of high blood pressure**  
 Accidental  Routine exam  Systematic exam  Complication  Associated disease  Other,  
 to specify:.....

| <b>General knowledge about blood pressure</b>                                 | <input type="radio"/> | <input type="radio"/> | <b>To be completed at the end</b>                                                                                                                                                     |
|-------------------------------------------------------------------------------|-----------------------|-----------------------|---------------------------------------------------------------------------------------------------------------------------------------------------------------------------------------|
| <b>Symptoms</b>                                                               | yes                   | no                    |                                                                                                                                                                                       |
| Headache                                                                      | <input type="radio"/> | <input type="radio"/> |                                                                                                                                                                                       |
| Auditory whistling                                                            | <input type="radio"/> | <input type="radio"/> |                                                                                                                                                                                       |
| Blurred vision (feeling of flies in front of the eyes)                        | <input type="radio"/> | <input type="radio"/> |                                                                                                                                                                                       |
| Dizziness                                                                     | <input type="radio"/> | <input type="radio"/> |                                                                                                                                                                                       |
| Palpitation (fast heart rate)                                                 | <input type="radio"/> | <input type="radio"/> |                                                                                                                                                                                       |
| Difficulty breathing                                                          | <input type="radio"/> | <input type="radio"/> |                                                                                                                                                                                       |
| Epistaxis (bleeding nose)                                                     | <input type="radio"/> | <input type="radio"/> |                                                                                                                                                                                       |
| Hematuria (presence of blood in the urine)                                    | <input type="radio"/> | <input type="radio"/> |                                                                                                                                                                                       |
| Œdema                                                                         | <input type="radio"/> | <input type="radio"/> |                                                                                                                                                                                       |
| <b>Complications</b>                                                          | yes                   | no                    |                                                                                                                                                                                       |
| Stroke                                                                        | <input type="radio"/> | <input type="radio"/> |                                                                                                                                                                                       |
| Heart attack                                                                  | <input type="radio"/> | <input type="radio"/> |                                                                                                                                                                                       |
| Kidney damage                                                                 | <input type="radio"/> | <input type="radio"/> |                                                                                                                                                                                       |
| Eye damage                                                                    | <input type="radio"/> | <input type="radio"/> |                                                                                                                                                                                       |
| <b>Compliance with preventive guidelines</b>                                  | yes                   | no                    |                                                                                                                                                                                       |
| Dietary and hygiene rules                                                     |                       |                       |                                                                                                                                                                                       |
| - loss of weight                                                              | <input type="radio"/> | <input type="radio"/> |                                                                                                                                                                                       |
| - ↓consumption of alcohol                                                     | <input type="radio"/> | <input type="radio"/> |                                                                                                                                                                                       |
| - ↓Tobacco                                                                    | <input type="radio"/> | <input type="radio"/> |                                                                                                                                                                                       |
| Physical activity                                                             | <input type="radio"/> | <input type="radio"/> |                                                                                                                                                                                       |
| Stress avoidance                                                              | <input type="radio"/> | <input type="radio"/> |                                                                                                                                                                                       |
| Dietary compliance                                                            | <input type="radio"/> | <input type="radio"/> |                                                                                                                                                                                       |
| Compliance with treatment                                                     | <input type="radio"/> | <input type="radio"/> |                                                                                                                                                                                       |
| Taking medication that can lead to an increase in hypertension                | <input type="radio"/> | <input type="radio"/> |                                                                                                                                                                                       |
| Self-measurement of blood pressure and regular medical (monitoring) follow-up | <input type="radio"/> | <input type="radio"/> |                                                                                                                                                                                       |
| <b>Variables associated with lifestyle / behaviors</b>                        | yes                   | no                    |                                                                                                                                                                                       |
| -Tobacco                                                                      | <input type="radio"/> | <input type="radio"/> | <p>If yes, specify : <input type="radio"/> current smoker <input type="radio"/> former smoker<br/> How many years have you stopped smoking?:</p> <p>Number of cigarettes per day:</p> |

|                                                                                                                                    |                          |                          |                                                                                                                                                                |
|------------------------------------------------------------------------------------------------------------------------------------|--------------------------|--------------------------|----------------------------------------------------------------------------------------------------------------------------------------------------------------|
| -Alcohol                                                                                                                           | <input type="checkbox"/> | <input type="checkbox"/> | If yes, specify : <input type="checkbox"/> Current drinker <input type="checkbox"/> Former Drinker<br>For how many years :<br><br>Quantity of glasses per day: |
| -Sedentarity                                                                                                                       | <input type="checkbox"/> | <input type="checkbox"/> | To be completed at the end<br><br>How many hours the patient remains seated or lying down:<br>.....                                                            |
| -Physical activity of more than 10 minutes duration (affiliate) (?) that has resulted in increased heart rate (moderate-vigorous)  | <input type="checkbox"/> | <input type="checkbox"/> | If yes how many times per week and how much time<br>-----<br>--                                                                                                |
| * Physical activity of more than 10 minutes duration in a row to move from one place to another, resulting in increased heart rate | <input type="checkbox"/> | <input type="checkbox"/> | If yes : <input type="checkbox"/> Low <input type="checkbox"/> Moderate <input type="checkbox"/> Vigorous<br>-----<br>--                                       |
| * Physical activity of more than 10 minutes leisurely that has led to an increase in heart rate (walking, running, fitness.)       | <input type="checkbox"/> | <input type="checkbox"/> | If yes : <input type="checkbox"/> Low <input type="checkbox"/> Moderate <input type="checkbox"/> Vigorous<br>-----<br>--                                       |

NB: low refers to intensity if the activity is carried out only one day or during less than 2 hours a week, while intense if it will be carried out at least for 4 days / week or more than 7 hours / week. it will be called moderate for the rest

|                                         |                          |                          |                                                                                                                                                                                |
|-----------------------------------------|--------------------------|--------------------------|--------------------------------------------------------------------------------------------------------------------------------------------------------------------------------|
| <b>Stress</b>                           |                          |                          | <input type="checkbox"/> no <input type="checkbox"/> Moderately <input type="checkbox"/> a lot                                                                                 |
| <b>Dietary compliance</b>               | <b>yes</b>               | <b>no</b>                | To be completed at the end                                                                                                                                                     |
| -Consumption of salt                    | <input type="checkbox"/> | <input type="checkbox"/> | If yes : <input type="checkbox"/> semi salty <input type="checkbox"/> salty                                                                                                    |
| -Difficulty to follow the diet          | <input type="checkbox"/> | <input type="checkbox"/> | Why? If yes, please explain :                                                                                                                                                  |
| <b>Family history of blood pressure</b> | <input type="checkbox"/> | <input type="checkbox"/> | If yes : <input type="checkbox"/> mother <input type="checkbox"/> father <input type="checkbox"/> sister <input type="checkbox"/> brother <input type="checkbox"/> grandparent |
| <b>Comorbidity</b>                      | <b>yes</b>               | <b>no</b>                |                                                                                                                                                                                |
| -Heart disease                          | <input type="checkbox"/> | <input type="checkbox"/> | If yes, type:-----                                                                                                                                                             |
| -Diabetes                               | <input type="checkbox"/> | <input type="checkbox"/> | If yes type : <input type="checkbox"/> type 1 <input type="checkbox"/> type 2                                                                                                  |
| -Dyslipidemia                           | <input type="checkbox"/> | <input type="checkbox"/> |                                                                                                                                                                                |
| -Chronic renal failure                  | <input type="checkbox"/> | <input type="checkbox"/> |                                                                                                                                                                                |
| <b>Treatment</b>                        | <b>yes</b>               | <b>no</b>                | Name of the drug                                                                                                                                                               |

|                                                   |                          |                          |                                                                                                                                                                                                                                                                         |
|---------------------------------------------------|--------------------------|--------------------------|-------------------------------------------------------------------------------------------------------------------------------------------------------------------------------------------------------------------------------------------------------------------------|
| (Pharmaceutical Trade Mark) drug<br>- Monotherapy | <input type="checkbox"/> | <input type="checkbox"/> | <input type="checkbox"/> Angiotensin II converting enzyme inhibitor <input type="checkbox"/><br>thiazide diuretic <input type="checkbox"/> beta-blocker <input type="checkbox"/> calcium channel<br>blocker <input type="checkbox"/> Angiotensin II receptor antagonist |
| -Dual therapy                                     | <input type="checkbox"/> | <input type="checkbox"/> | <input type="checkbox"/> Angiotensin II converting enzyme inhibitor <input type="checkbox"/><br>thiazide diuretic <input type="checkbox"/> beta-blocker <input type="checkbox"/> calcium channel<br>blocker <input type="checkbox"/> Angiotensin II receptor antagonist |
| -triple therapy                                   | <input type="checkbox"/> | <input type="checkbox"/> | <input type="checkbox"/> Angiotensin II converting enzyme inhibitor <input type="checkbox"/><br>thiazide diuretic <input type="checkbox"/> beta-blocker <input type="checkbox"/> calcium channel<br>blocker <input type="checkbox"/> Angiotensin II receptor antagonist |
| Generic drug ( ?)                                 | <input type="checkbox"/> | <input type="checkbox"/> | <input type="checkbox"/> Angiotensin II converting enzyme inhibitor <input type="checkbox"/><br>thiazide diuretic <input type="checkbox"/> beta-blocker <input type="checkbox"/> calcium channel<br>blocker <input type="checkbox"/> Angiotensin II receptor antagonist |

**Treatment time in months** : -----

|                                                                                                            |                              |                             |                                                                                                                                                                                                                                                            |
|------------------------------------------------------------------------------------------------------------|------------------------------|-----------------------------|------------------------------------------------------------------------------------------------------------------------------------------------------------------------------------------------------------------------------------------------------------|
| <b>Compliance with treatment</b>                                                                           | <input type="checkbox"/>     | <input type="checkbox"/>    | To be completed at the end                                                                                                                                                                                                                                 |
| Did you forget to take your medication this morning?                                                       |                              |                             | <input type="checkbox"/> yes <input type="checkbox"/> no                                                                                                                                                                                                   |
| Have you been out of medication since the last consultation?                                               |                              |                             | <input type="checkbox"/> yes <input type="checkbox"/> no. If yes : Did you:<br><input type="checkbox"/> buy it from the pharmacy<br><input type="checkbox"/> take another drug <input type="checkbox"/><br>remained without <input type="checkbox"/> other |
| Have you had to take your treatment late compared to the usual time?                                       |                              |                             | <input type="checkbox"/> yes <input type="checkbox"/> no                                                                                                                                                                                                   |
| Have you ever missed your treatment because some days because of your memory lacking                       |                              |                             | <input type="checkbox"/> yes <input type="checkbox"/> no                                                                                                                                                                                                   |
| Have you ever missed treatment because some days you feel that your treatment is doing more harm than good |                              |                             | <input type="checkbox"/> yes <input type="checkbox"/> no                                                                                                                                                                                                   |
| Do you think you have too many (tablets) pills to take?                                                    |                              |                             | <input type="checkbox"/> yes <input type="checkbox"/> no                                                                                                                                                                                                   |
| <b>Frequency of blood pressure self-monitoring</b>                                                         | <input type="checkbox"/> yes | <input type="checkbox"/> no | To be completed at the end                                                                                                                                                                                                                                 |
| Do you measure your home blood pressure?                                                                   | <input type="checkbox"/> yes | <input type="checkbox"/> no | If no, why :<br><input type="checkbox"/> No instrument of measure<br><input type="checkbox"/> other to specify                                                                                                                                             |

**Relationship with the care system**

|                                                                  |                                                                                                                                                                                                                                                             |                                                                                                       |
|------------------------------------------------------------------|-------------------------------------------------------------------------------------------------------------------------------------------------------------------------------------------------------------------------------------------------------------|-------------------------------------------------------------------------------------------------------|
| Do you go to (get an appointment with) a doctor for your tension | <input type="checkbox"/> yes <input type="checkbox"/> no                                                                                                                                                                                                    | If yes, does it belong to the sector <input type="checkbox"/> public <input type="checkbox"/> private |
| Frequency of medical appointments                                | <input type="checkbox"/> once a month <input type="checkbox"/> every 2 months <input type="checkbox"/><br>every three months <input type="checkbox"/> every six months <input type="checkbox"/><br>never <input type="checkbox"/> just if I fell myself bad |                                                                                                       |
| What is the distance between your house and                      | <input type="checkbox"/> <6 km <input type="checkbox"/> between 6 and 10 km <input type="checkbox"/> >10                                                                                                                                                    |                                                                                                       |

|                                                                                                               |                                                                                                                                                                          |
|---------------------------------------------------------------------------------------------------------------|--------------------------------------------------------------------------------------------------------------------------------------------------------------------------|
| health center                                                                                                 | km                                                                                                                                                                       |
| Time taken to reach the health center                                                                         | <input type="radio"/> less than 30 min <input type="radio"/> between 30 mn and 1 h<br><input type="radio"/> more than one hour                                           |
| transportation mode                                                                                           | <input type="radio"/> walk <input type="radio"/> Chariot <input type="radio"/> Taxi <input type="radio"/> Bus <input type="radio"/> car<br><input type="radio"/> bicycle |
| Availability of the drug for blood pressure                                                                   | <input type="radio"/> yes <input type="radio"/> no                                                                                                                       |
| <b>Patient doctor relationship</b>                                                                            | To be completed at the end                                                                                                                                               |
| How long does the doctor allow you during the medical appointment (consultation) in term of time (in minutes) |                                                                                                                                                                          |
| Do you discuss with your doctor your personal concerns/issues about hypertension?                             | <input type="radio"/> yes <input type="radio"/> no                                                                                                                       |
| Do you (feel the desire of) expect your doctor to better understand you?                                      | <input type="radio"/> yes <input type="radio"/> no                                                                                                                       |
| Are you setting blood pressure goals?                                                                         | <input type="radio"/> yes <input type="radio"/> no                                                                                                                       |
| Do someone (we) call you when you miss your appointment                                                       | <input type="radio"/> yes <input type="radio"/> no                                                                                                                       |
| <b>Do you have an association for hypertensive</b>                                                            | <input type="radio"/> yes <input type="radio"/> no                                                                                                                       |

**Anthropological measurement ( ? )**

|                                                      | Systolic, in mmHg | Diastolic, in mmHg |
|------------------------------------------------------|-------------------|--------------------|
| 1 <sup>th</sup> measure, right arm                   |                   |                    |
| 1 <sup>st</sup> measure, left arm                    |                   |                    |
| 2 <sup>nd</sup> measurement at the high pressure arm |                   |                    |
| 3 <sup>rd</sup> measurement at the high pressure arm |                   |                    |
| <b>Mean</b>                                          |                   |                    |

Weight (kg): \_\_\_\_\_ Height (cm): \_\_\_\_\_  
 Hip circumference (cm): \_\_\_\_\_ Waist (cm): \_\_\_\_\_  
 Blood pressure during last three visits (mmHg): \_\_\_\_\_, \_\_\_\_\_, \_\_\_\_\_

*Follow-up review*

- ECG:**  yes  no      Result: \_\_\_\_\_
- Electrolytes or ions (sodium, potassium):**  yes       no      Result: \_\_\_\_\_
- Creatinine blood test:**  yes       no      Result: \_\_\_\_\_
- Fasting blood glucose or glycated Hemoglobin (HbA1c):**  yes       no      Result: \_\_\_\_\_
- Lipid profil:**  yes       no
- Total Cholesterol:  yes       no      Result: \_\_\_\_\_
- C-HDL:  yes       no      Result: \_\_\_\_\_
- C-LDL:  yes       no      Result: \_\_\_\_\_
- Triglycerides:  yes       no      Result: \_\_\_\_\_

## Doctor's questionnaire on blood pressure

### Survey information

Survey location: ----- Date of survey: /\_\_//\_\_ / \_\_//\_\_ / \_\_//\_\_ /  
dd mm yy

### Patient identify

/\_\_//\_\_ / \_\_//\_\_ / (patient order number + interviewer ID)

Weight (kg) : \_\_\_\_\_ (Size) Height (cm) : \_\_\_\_\_  
 Hip circumference (cm) : \_\_\_\_\_ Waist (cm): \_\_\_\_\_  
 Blood pressure during last visit (mmHg): \_\_\_\_\_

*The information collected by means of this document will be treated with the utmost confidentiality and are subject to the rules of ethics relating to the respect of the medical confidentiality.*

### Treatment modification

**Management of associated cardiovascular risk factors:** (Nicotine) Replacement   
 therapy for weaning tobacco  , Weight loss  , control of diabetes  , taking a statin  , taking a cardioaspirin

**Please check (tick) all the corresponding box that apply**

| Modified treatment                                 | Check box                |
|----------------------------------------------------|--------------------------|
| Blood pressure in poorly controlled consultation   | <input type="checkbox"/> |
| Self-measurement made by poorly controlled patient | <input type="checkbox"/> |
| Poorly tolerated treatment                         | <input type="checkbox"/> |
| Prescription of generic drugs                      | <input type="checkbox"/> |
| Trial of a new drug                                | <input type="checkbox"/> |
| Prescription of a fixed combination                | <input type="checkbox"/> |
| Simplification of the medical prescription         | <input type="checkbox"/> |
| Decrease in the cost of prescription               | <input type="checkbox"/> |
| Follow-up of Ministry of Health program guidelines | <input type="checkbox"/> |
| Other(s) to be specified                           | <input type="checkbox"/> |

| <b>Unmodified treatment</b>                                                                                           | Check box                |
|-----------------------------------------------------------------------------------------------------------------------|--------------------------|
| Poor compliance with treatment by the patient                                                                         | <input type="checkbox"/> |
| Controlled blood pressure at the previous visit                                                                       | <input type="checkbox"/> |
| Reluctance of the patient to take a new medicine                                                                      | <input type="checkbox"/> |
| Cost of important drugs                                                                                               | <input type="checkbox"/> |
| White coat hypertension syndrome                                                                                      | <input type="checkbox"/> |
| Etiological blood test in progress                                                                                    | <input type="checkbox"/> |
| Difficulty in controlling blood pressure despite several therapeutic modifications                                    | <input type="checkbox"/> |
| Recent change of treatment (less to 4 weeks)                                                                          | <input type="checkbox"/> |
| Multiple drug intolerance syndrome                                                                                    | <input type="checkbox"/> |
| Current intake of drugs that can affect the BP (anti inflammatory, corticoids, estrogen-progestative association ...) | <input type="checkbox"/> |
| Management of associated cardiovascular risk factors (smoking cessation, weight loss, diabetes balance, statin)       | <input type="checkbox"/> |
| Chronic alcoholic poisoning                                                                                           | <input type="checkbox"/> |
| Lack of time in consultation to explain the new treatment                                                             | <input type="checkbox"/> |
| Lack of motivation for the patient                                                                                    | <input type="checkbox"/> |
| Recent emotional event                                                                                                | <input type="checkbox"/> |
| Others                                                                                                                | <input type="checkbox"/> |
